# Supplementary material for: Longitudinal Trends in Blood Pressure Associated With the Frequency of Laughter: The Circulatory Risk in Communities Study (CIRCS), a Longitudinal Study of the Japanese General Population
Source: PubMed Central journal article supplement (PMC7813767; doi:10.2188/jea.je20190140), 2021-02-05
Supplement: je-31-125-s001.pdf [file je-31-125-s001.pdf]

**eTable 1.** Sex-specific changes in systolic and diastolic blood pressures with time by the frequency of laughter in everyday life according to drinking status

|                                 | Men                         |                      |                                     |                             |                      | Women                               |                             |                      |                                     |      |
|---------------------------------|-----------------------------|----------------------|-------------------------------------|-----------------------------|----------------------|-------------------------------------|-----------------------------|----------------------|-------------------------------------|------|
|                                 | Frequency of laughter       |                      |                                     |                             |                      | Frequency of laughter               |                             |                      |                                     |      |
|                                 | Almost everyday (reference) | 1 to 5 days per week | 1 to 3 days a month or almost never | Almost everyday (reference) | 1 to 5 days per week | 1 to 3 days a month or almost never | Almost everyday (reference) | 1 to 5 days per week | 1 to 3 days a month or almost never |      |
|                                 | Non current drinkers        |                      |                                     |                             |                      |                                     |                             |                      |                                     |      |
| <b>Number</b>                   | 116                         | 55                   | 21                                  | 555                         | 159                  | 40                                  |                             |                      |                                     |      |
|                                 |                             | $\beta$ (95% CI)     | <i>p</i> value                      | $\beta$ (95% CI)            | <i>p</i> value       | $\beta$ (95% CI)                    | <i>p</i> value              | $\beta$ (95% CI)     | <i>p</i> value                      |      |
| <b>Systolic blood pressure</b>  |                             |                      |                                     |                             |                      |                                     |                             |                      |                                     |      |
| Baseline difference             | 0                           | -0.59(-5.1, 4.0)     | 0.80                                | -3.97(-10.3, 3.0)           | 0.28                 | 0                                   | 1.02(-1.6, 3.7)             | 0.45                 | 0.03(-4.9, 5.0)                     | 0.99 |
| Time-dependent difference**     | 0                           | 0.09(-1.1, 1.2)      | 0.89                                | 0.04(-1.7, 1.9)             | 0.97                 | 0                                   | -0.24(-0.9, 0.5)            | 0.49                 | 0.07(-1.2, 1.4)                     | 0.92 |
| <b>Diastolic blood pressure</b> |                             |                      |                                     |                             |                      |                                     |                             |                      |                                     |      |
| Baseline difference             | 0                           | 1.27(-1.6, 4.5)      | 0.42                                | -4.05(-9.0, 0.7)            | 0.11                 | 0                                   | 0.79(-1.1, 2.7)             | 0.41                 | -0.19(-3.7, 3.3)                    | 0.91 |
| Time-dependent difference**     | 0                           | -0.18(0.9, 0.5)      | 0.62                                | 0.05(-1.1, 1.2)             | 0.93                 | 0                                   | -0.37(-0.8, 0.1)            | 0.09                 | -0.12(-0.9, 0.7)                    | 0.77 |
|                                 | Current drinkers            |                      |                                     |                             |                      |                                     |                             |                      |                                     |      |
| <b>Number</b>                   | 202                         | 109                  | 51                                  | 98                          | 31                   | 4                                   |                             |                      |                                     |      |
|                                 |                             | $\beta$ (95% CI)     | <i>p</i> value                      | $\beta$ (95% CI)            | <i>p</i> value       | $\beta$ (95% CI)                    | <i>p</i> value              | $\beta$ (95% CI)     | <i>p</i> value                      |      |
| <b>Systolic blood pressure</b>  |                             |                      |                                     |                             |                      |                                     |                             |                      |                                     |      |
| Baseline difference             | 0                           | 0.41(-3.1, 4.4)      | 0.83                                | -2.04(-7.1, 3.0)            | 0.43                 | 0                                   | 1.17(-5.2, 7.4)             | 0.71                 | 6.59(-8.5, 21.7)                    | 0.39 |
| Time-dependent difference**     | 0                           | -0.49(-1.5, 0.4)     | 0.29                                | 1.29(-0.1, 2.3)             | 0.04*                | 0                                   | 0.31(-1.3, 2.0)             | 0.71                 | 0.78(-4.8, 6.4)                     | 0.78 |
| <b>Diastolic blood pressure</b> |                             |                      |                                     |                             |                      |                                     |                             |                      |                                     |      |
| Baseline difference             | 0                           | -1.35(-3.7, 1.3)     | 0.29                                | -2.10(-5.3, 1.4)            | 0.22                 | 0                                   | 1.45(-3.3, 5.9)             | 0.54                 | -1.49(-12.5, 9.5)                   | 0.79 |
| Time-dependent difference**     | 0                           | -0.03(-0.6, 0.5)     | 0.93                                | 0.96(0.1, 1.6)              | 0.01*                | 0                                   | -0.29(-1.3, 0.8)            | 0.59                 | 0.76(-2.9, 4.5)                     | 0.69 |

CI, confidence interval; SD, standard deviation.

\* *p* value of interaction with time

\*\* Time×the frequency of laughter

**eTable 2.** Sex-specific changes in systolic and diastolic blood pressures with time by the frequency of laughter in everyday life without controlling for psychological conditions

|                                 | Men                         |                      |                                     |                  |                             | Women                 |                                     |                  |                  |      |
|---------------------------------|-----------------------------|----------------------|-------------------------------------|------------------|-----------------------------|-----------------------|-------------------------------------|------------------|------------------|------|
|                                 | Frequency of laughter       |                      |                                     |                  |                             | Frequency of laughter |                                     |                  |                  |      |
|                                 | Almost everyday (reference) | 1 to 5 days per week | 1 to 3 days a month or almost never |                  | Almost everyday (reference) | 1 to 5 days per week  | 1 to 3 days a month or almost never |                  |                  |      |
| Number                          | 318                         | 164                  | 72                                  |                  | 653                         | 190                   | 44                                  |                  |                  |      |
|                                 |                             | $\beta$ (95% CI)     | <i>p</i> value                      | $\beta$ (95% CI) | <i>p</i> value              | $\beta$ (95% CI)      | <i>p</i> value                      | $\beta$ (95% CI) | <i>p</i> value   |      |
| <b>Systolic blood pressure</b>  |                             |                      |                                     |                  |                             |                       |                                     |                  |                  |      |
| Baseline difference             | 0                           | 0.72(-2.2, 3.7)      | 0.62                                | -3.6(-7.6, 0.4)  | 0.17                        | 0                     | 0.64(-1.8, 3.1)                     | 0.61             | -0.36(-5.1, 4.3) | 0.88 |
| Time-dependent difference**     | 0                           | -0.39(-1.1, 0.3)     | 0.34                                | 0.83(-0.1, 1.8)  | 0.08*                       | 0                     | -0.14(-0.8, 0.5)                    | 0.65             | 0.24(-1.0, 1.5)  | 0.71 |
| <b>Diastolic blood pressure</b> |                             |                      |                                     |                  |                             |                       |                                     |                  |                  |      |
| Baseline difference             | 0                           | -0.08(-0.5, 0.3)     | 0.73                                | -2.67(-5.3, 0.1) | 0.06                        | 0                     | 0.67(-1.1, 2.4)                     | 0.45             | -0.99(-4.3, 2.3) | 0.56 |
| Time-dependent difference**     | 0                           | -0.07(-0.5, 0.4)     | 0.74                                | 0.65(0.1, 1.2)   | 0.03*                       | 0                     | -0.34(-0.7, 0.4)                    | 0.08             | -0.08(-0.8, 0.7) | 0.85 |

CI, confidence interval.

\* *p* value of interaction with time

\*\* Time×the frequency of laughter
